# Supplementary material
Source: publisher figshare collection journal article supplement (https://future-science-group.figshare.com/ndownloader/files/28660836)

**Supplementary Figure 2.**


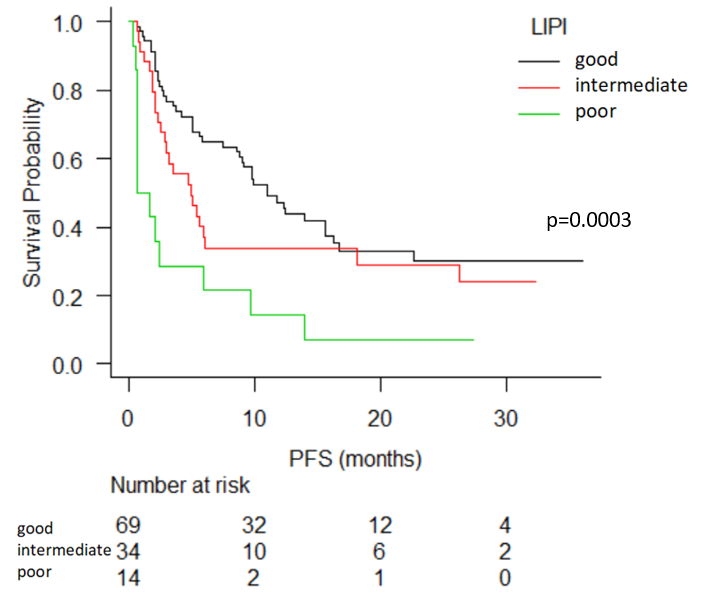

Supplement: Supplementary file 1 [file 28660836]
